# Supplementary material for: A Novel Deep Learning Approach for Recognizing Stereotypical Motor Movements within and across Subjects on the Autism Spectrum Disorder
Source: Hindawi journal article supplement (doi:10.1155/2018/7186762), 2018-07-10
Supplement: f1 [file 7186762.f1.pdf]

Table 1: Length values of the 30 peaks selected from 30 randomly selected signals of the “SMM dataset”.

| (a) Time-domain     |                   |          | (b) Frequency-domain |                   |           |
|---------------------|-------------------|----------|----------------------|-------------------|-----------|
| Starting time point | Ending time point | Length   | Starting time point  | Ending time point | Length    |
| 60                  | 69                | 9        | 10                   | 20                | 10        |
| 69                  | 77                | 8        | 8                    | 18                | 10        |
| 24                  | 33                | 9        | 11                   | 20                | 9         |
| 22                  | 36                | 14       | 8                    | 17                | 9         |
| 19                  | 30                | 11       | 11                   | 26                | 15        |
| 64                  | 72                | 8        | 12                   | 24                | 12        |
| 62                  | 70                | 8        | 24                   | 39                | 15        |
| 7                   | 18                | 11       | 11                   | 22                | 11        |
| 17                  | 29                | 12       | 2                    | 12                | 10        |
| 65                  | 85                | 20       | 9                    | 19                | 10        |
| 4                   | 13                | 9        | 4                    | 12                | 8         |
| 34                  | 47                | 13       | 7                    | 16                | 9         |
| 44                  | 56                | 12       | 9                    | 17                | 8         |
| 76                  | 85                | 9        | 9                    | 18                | 9         |
| 16                  | 28                | 12       | 11                   | 21                | 10        |
| 54                  | 72                | 18       | 5                    | 13                | 8         |
| 15                  | 23                | 8        | 7                    | 18                | 11        |
| 39                  | 47                | 8        | 7                    | 12                | 5         |
| 44                  | 51                | 7        | 2                    | 8                 | 6         |
| 17                  | 35                | 18       | 5                    | 13                | 8         |
| 41                  | 52                | 11       | 6                    | 17                | 11        |
| 48                  | 55                | 7        | 7                    | 19                | 12        |
| 19                  | 30                | 11       | 3                    | 11                | 8         |
| 48                  | 57                | 9        | 7                    | 21                | 14        |
| 39                  | 47                | 8        | 1                    | 8                 | 7         |
| 14                  | 23                | 9        | 5                    | 15                | 10        |
| 39                  | 46                | 7        | 9                    | 21                | 12        |
| 62                  | 72                | 10       | 10                   | 19                | 9         |
| 42                  | 52                | 10       | 9                    | 19                | 10        |
| 7                   | 16                | 9        | 8                    | 19                | 11        |
| <b>Median</b>       |                   | <b>9</b> | <b>Median</b>        |                   | <b>10</b> |

Table (a) and (b) represent peak lengths taken from 30 randomly selected time and frequency domain signals. From left to right, the three columns of each table stand for the peak starting time point, peak ending time point and peak length of those 30 signals. These peak lengths are summarized in histograms (a) and (b) within Figure 5.
